# Supplementary material for: Mesure lagrangienne en turbulence : mise en oeuvre et analyse
Source: Royal Society of Chemistry journal article supplement (doi:10.1039/c8ra01806e), 2001-11-15

## Electronic Supplementary Information

### Bicyclo[2.2.1]heptane Containing N,N'-diarylsquaramides CXCR2 Selective Antagonists as Anti-cancer Metastasis Agents

Jin-Xin Che,<sup>a</sup> Zhi-Long Wang,<sup>b</sup> Xiao-Wu Dong,<sup>a</sup> You-Hong Hu,<sup>b</sup> Xin Xie<sup>\*b, c</sup> and  
Yong-Zhou Hu<sup>\*a</sup>

<sup>a</sup> ZJU-ENS Joint Laboratory of Medicinal Chemistry, College of Pharmaceutical  
Sciences, Zhejiang University, Hangzhou, PR China.

<sup>b</sup> State Key Laboratory of Drug Research, Shanghai Institute of Materia Medica,  
Chinese Academy of Sciences, Shanghai, PR China

<sup>c</sup> CAS Key Laboratory of Receptor Research, the National Center for Drug Screening,  
Shanghai Institute of Materia Medica, Chinese Academy of Sciences, Shanghai, PR  
China.

\*Corresponding authors:

E-mail: [huyz@zju.edu.cn](mailto:huyz@zju.edu.cn) (Yong-Zhou Hu) ; E-mail: [xxie@mail.shnc.ac.cn](mailto:xxie@mail.shnc.ac.cn) (Xin Xie)

#### Table of contents

|                                                              |   |
|--------------------------------------------------------------|---|
| Figure S1. CXCR2 homologous modeling .....                   | 2 |
| Table S1. CXCR1 and CXCR2 IC <sub>50</sub> curve graphs..... | 3 |
| NMR spectras of compound 1a and 2e .....                     | 5 |

# Figure S1. CXCR2 homologous modeling

## Align Sequence to Templates

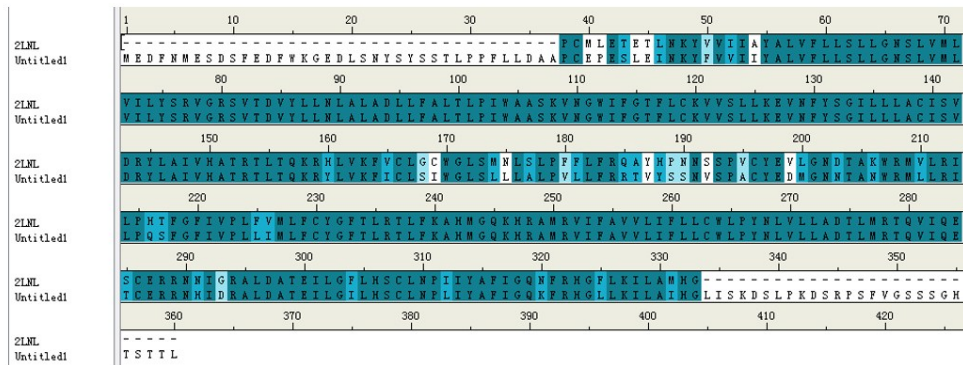

## Homologous Modeling (Build Homology Models, Standard Dynamic Cascade)

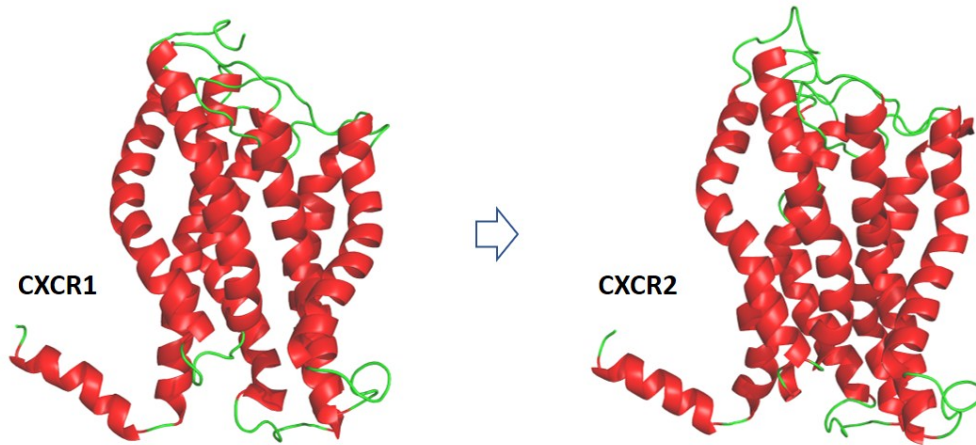

**Table S1. CXCR1 and CXCR2 IC<sub>50</sub> curve graphs**

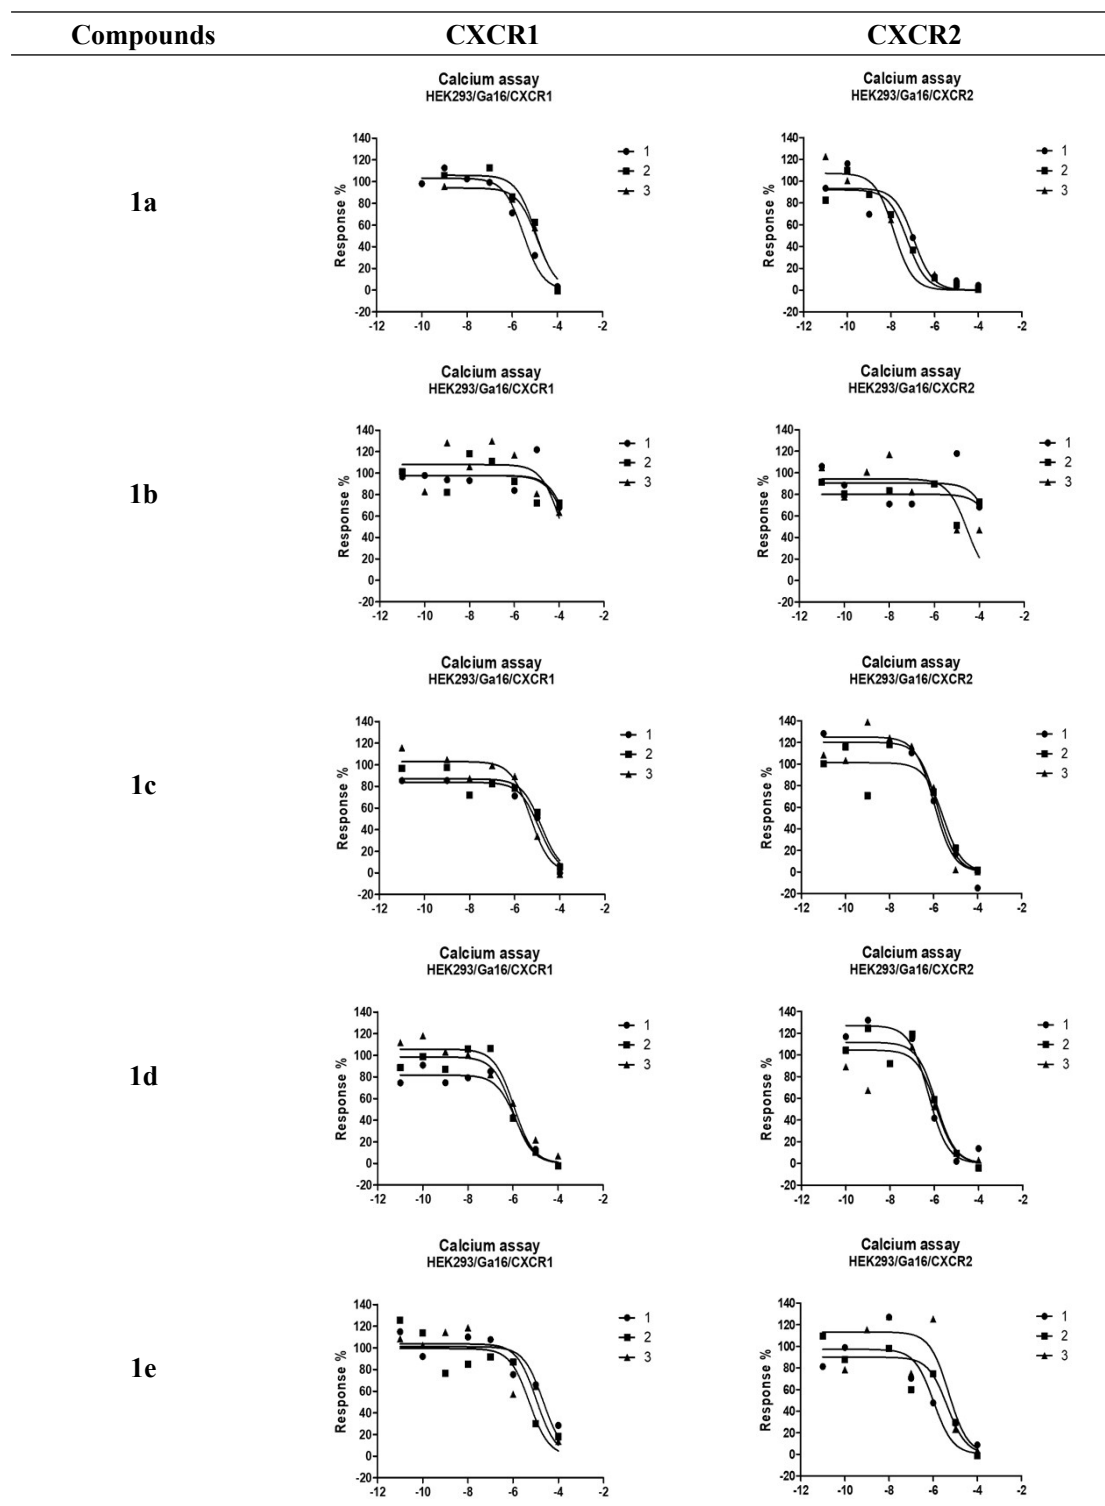

1f

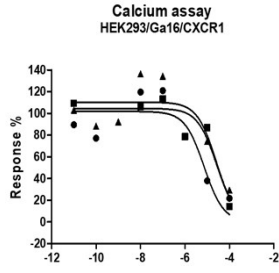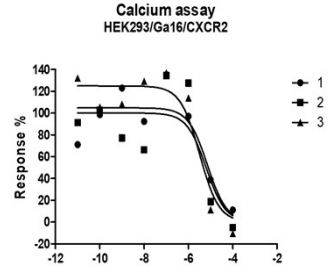

2a

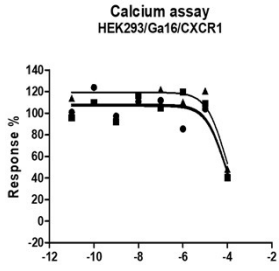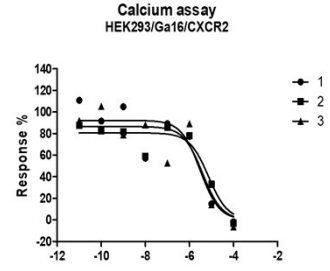

2b

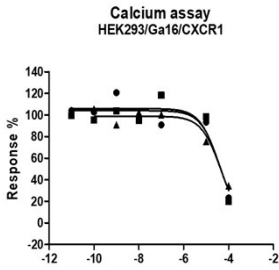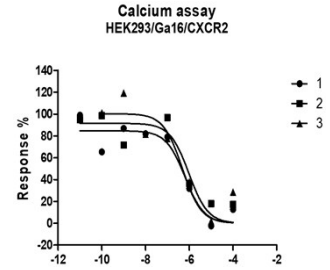

2c

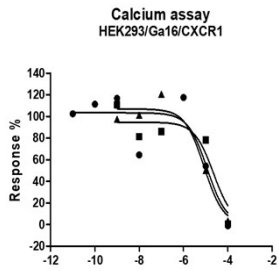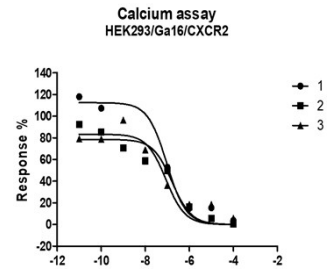

2d

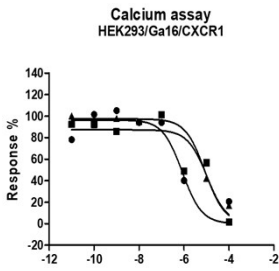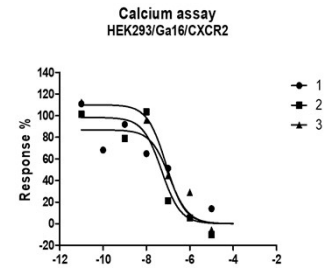

2e

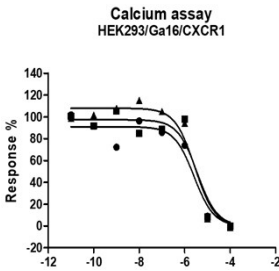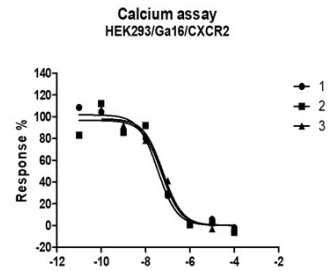

2f

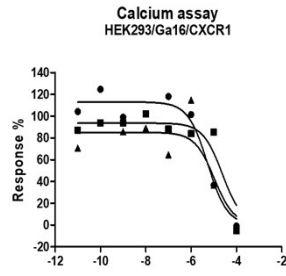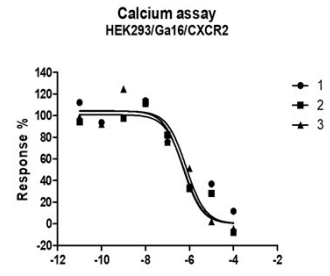

2g

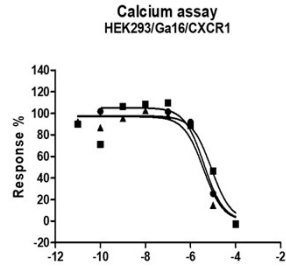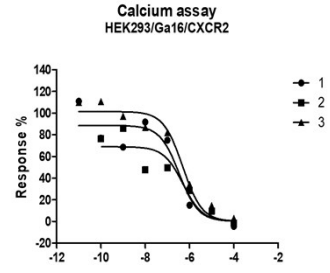

2h

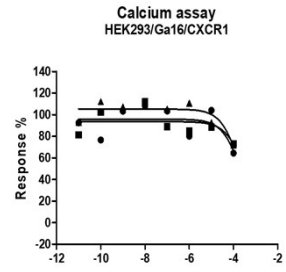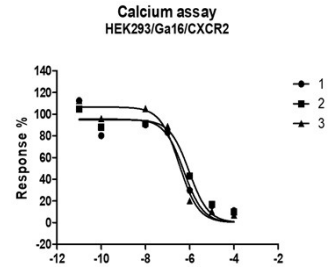

# NMR spectras of compound 1a and 2e

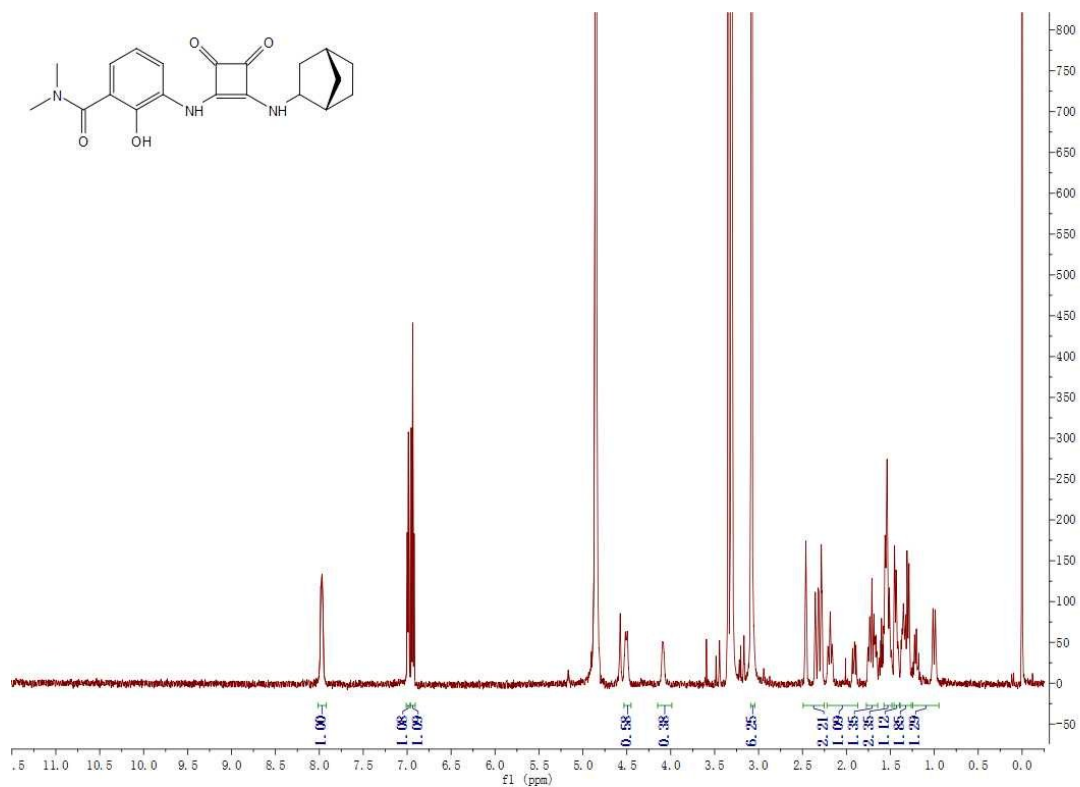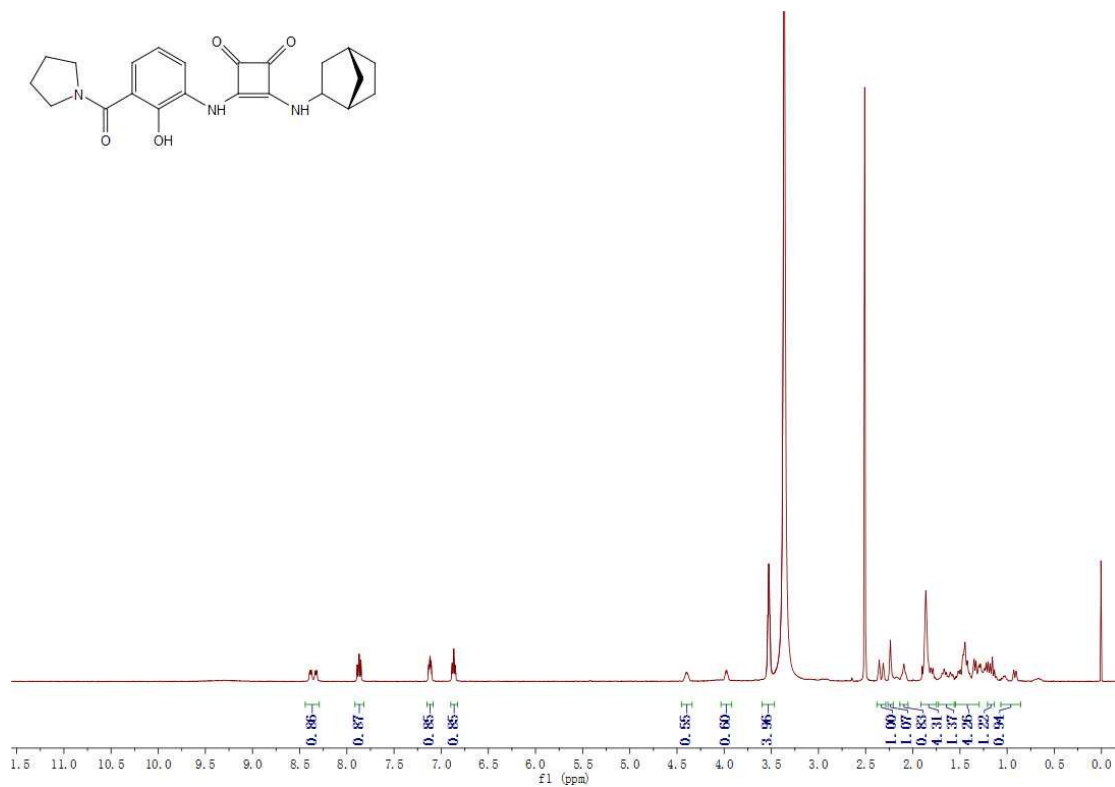

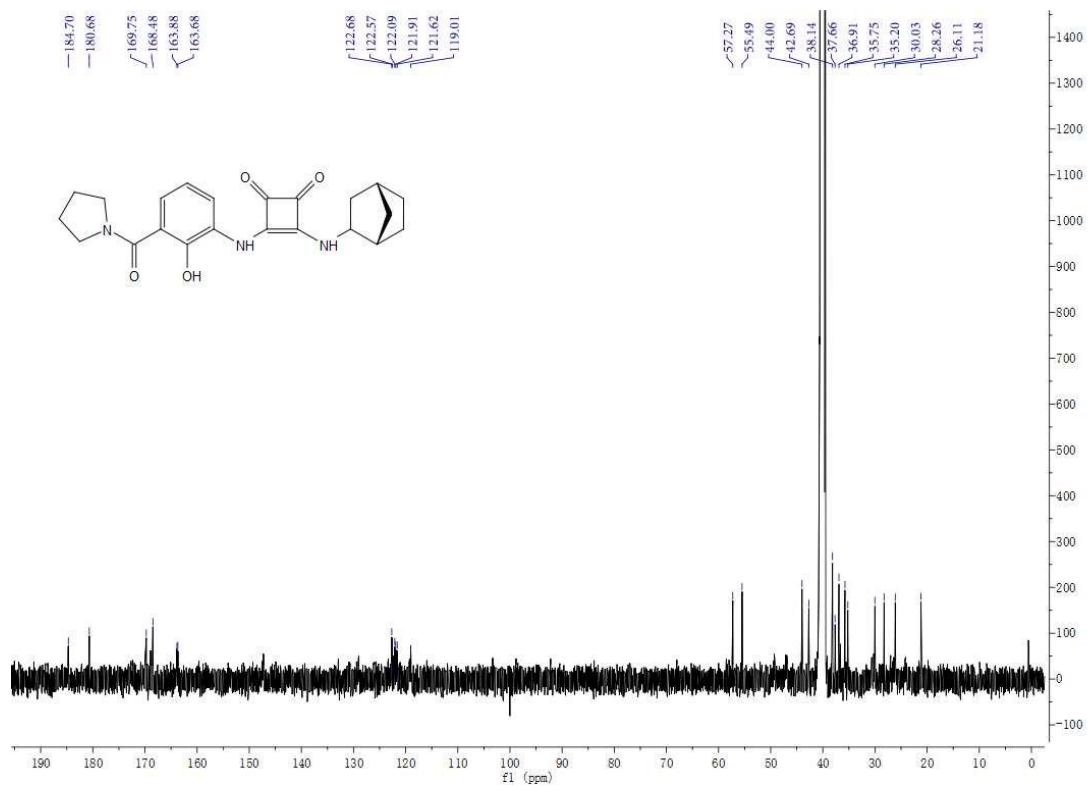

Supplement: c8ra01806e1.pdf [file c8ra01806e1.pdf]
